# Supplementary material for: PD-1-expressing macrophages and CD8 T cells are independent predictors of clinical benefit from PD-1 inhibition in advanced mesothelioma
Source: HighWire-hosted journal article supplement (doi:10.1136/jitc-2023-007585), 2023-10-01
Supplement: jitc-2023-007585supp001_data_supplement.pdf [file jitc-2023-007585supp001_data_supplement.pdf]

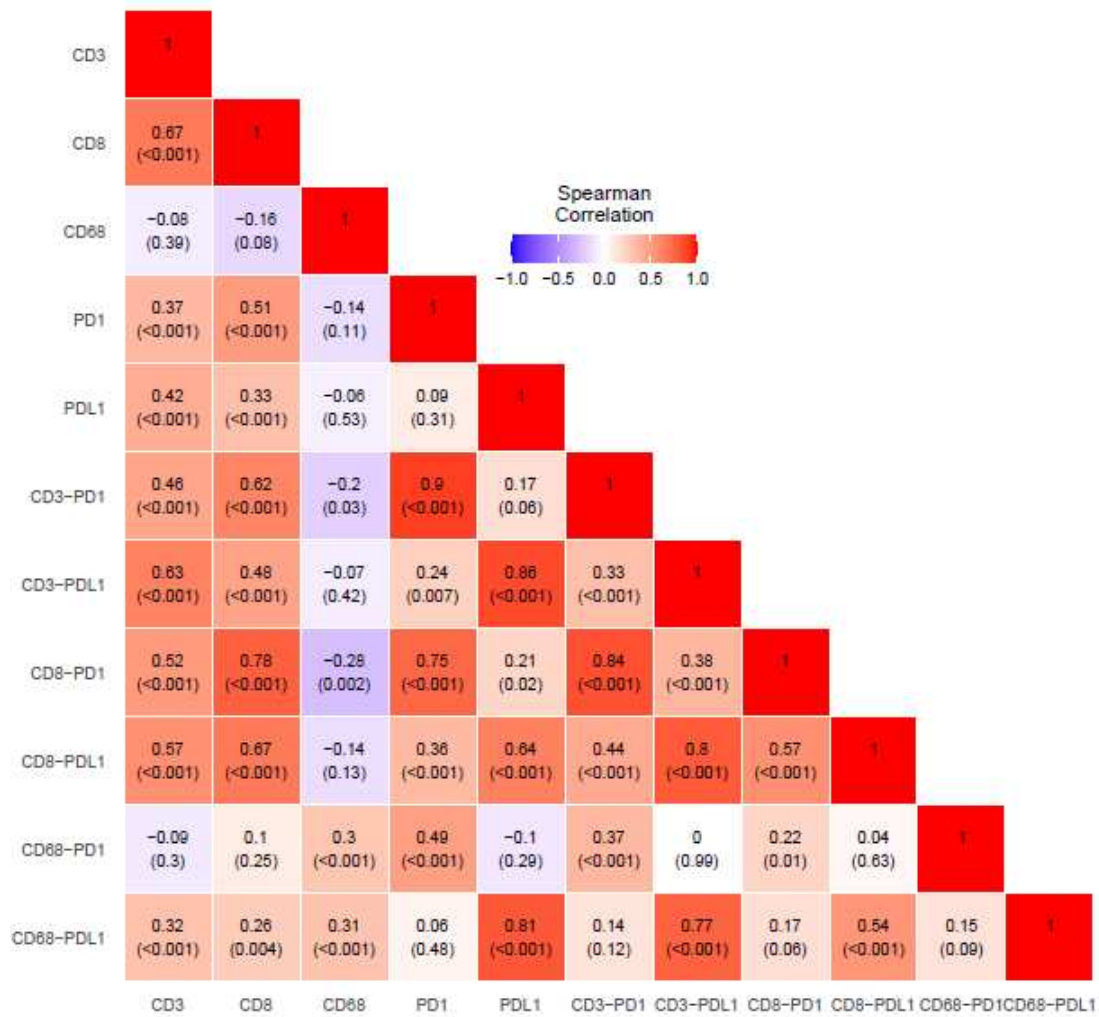

**Extended Data Figure 1:** Heatmap for the between-marker Spearman correlations.

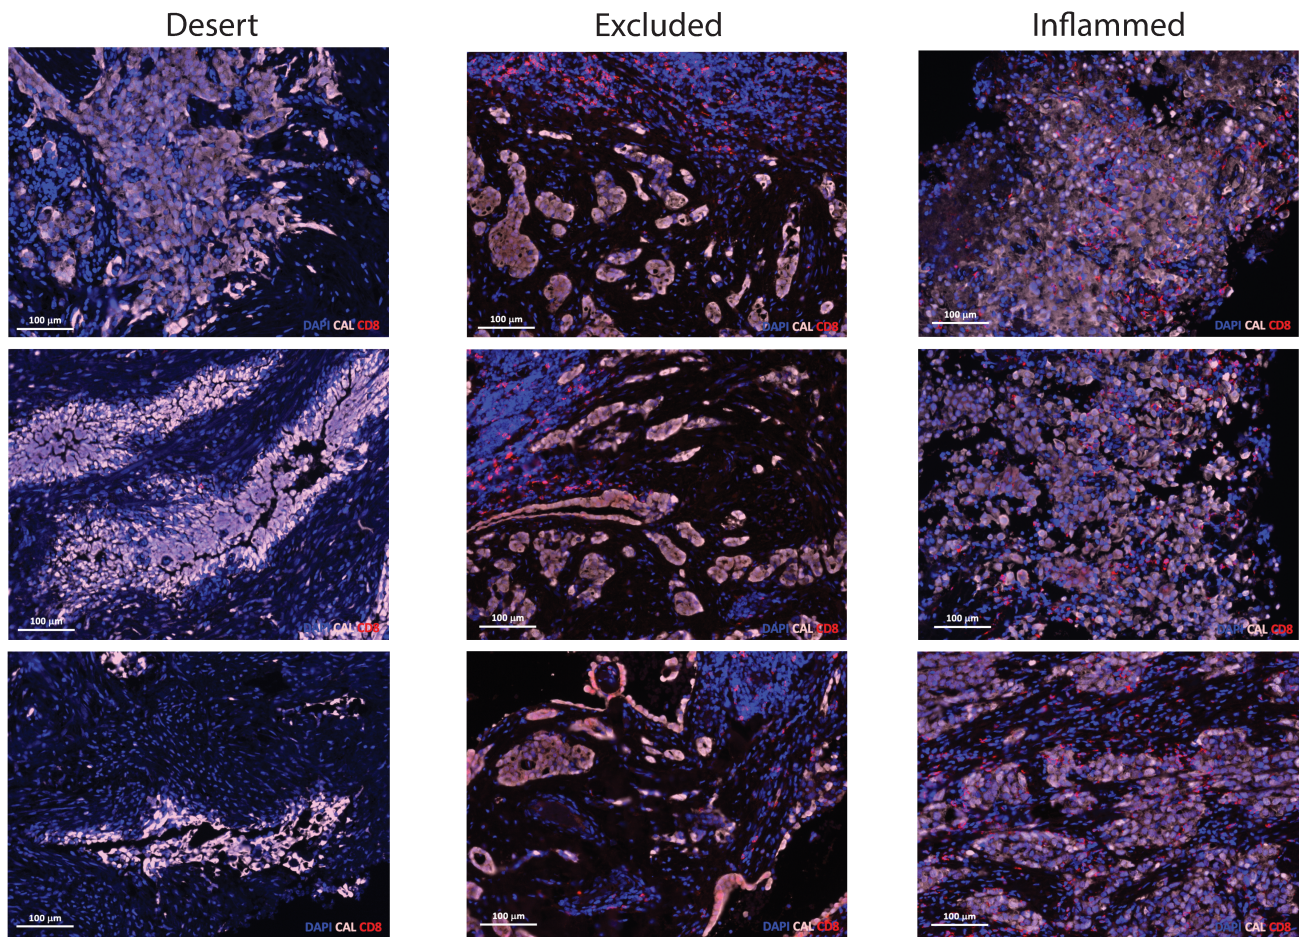

**Extended Data Figure 2:** Examples (n=3) for each of the tumor inflammation types

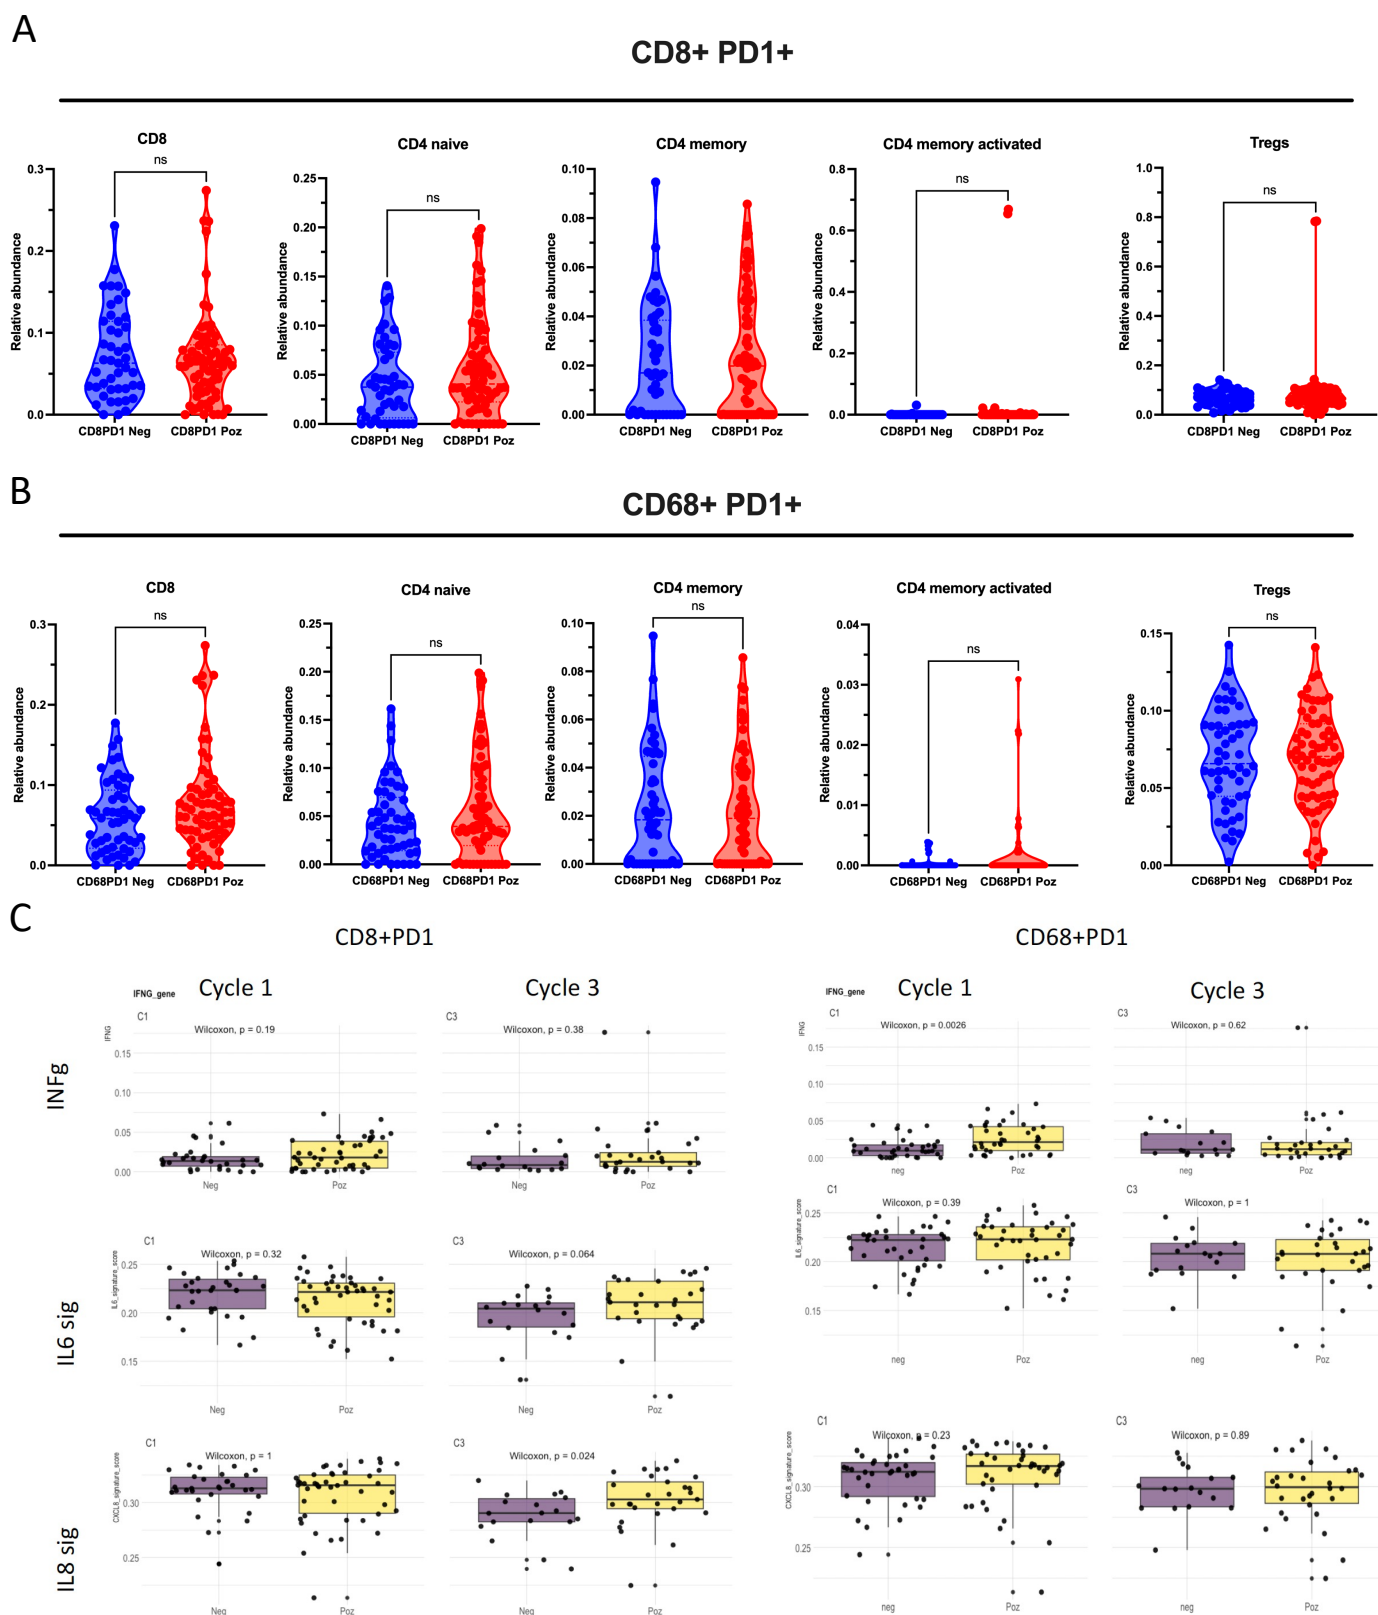

**Extended Data Figure 3. CibersortX deconvolution and pathway analysis of peripheral blood whole RNA sequencing, A)** Comparison of CibersortX prediction of cell fractions of CD8 T cells, CD4 T cells and Treg in patients with and without CD8+PD1+ cells. **B)** Comparison of CibersortX prediction of cell fractions of CD8 T cells, CD4 T cells and Treg in patients with and without CD68+PD1+ cells. **C)** Pathway analysis of INFg, IL6 and IL8 signatures comparing CD8+PD1+ or CD68+PD1+ negative and positive patients

**Extended Data Table 1:** Baseline characteristics, overall and by treatment arm.

(\* Fisher's exact for categorical, Mann-Whitney U test for continuous variables, (¥) Category "Unknown/Missing" excluded, (§) Categories "Current" & "Former" combined, (\$) Categories "1" & "2" combined, (~) 1 case of ECOG PS 2 due to leg braces

| Characteristic                                              | Pembrolizumab<br>(n=64) | Chemotherapy<br>(n=61) | All patients<br>(N=125) | p-value*     |
|-------------------------------------------------------------|-------------------------|------------------------|-------------------------|--------------|
| <b>Sex - n (%)</b>                                          |                         |                        |                         |              |
| Male                                                        | 51 (79.7)               | 51 (83.6)              | 102 (81.6)              | 0.65         |
| Female                                                      | 13 (20.3)               | 10 (16.4)              | 23 (18.4)               |              |
| <b>Age (yrs at randomization)</b>                           |                         |                        |                         |              |
| Mean (95% CI)                                               | 67.6 (65.8 - 69.4)      | 70.2 (68.5 - 71.9)     | 68.9 (67.6 - 70.1)      | <b>0.020</b> |
| Median (Min-Max)                                            | 69 (52 - 83)            | 72 (53 - 83)           | 70 (52 - 83)            |              |
| <b>Age (category) - n (%)</b>                               |                         |                        |                         |              |
| <70                                                         | 36 (56.3)               | 24 (39.3)              | 60 (48.0)               | 0.074        |
| ≥70                                                         | 28 (43.8)               | 37 (60.7)              | 65 (52.0)               |              |
| <b>Histologic subtype - n (%)</b>                           |                         |                        |                         |              |
| Epithelioid                                                 | 59 (92.2)               | 54 (88.5)              | 113 (90.4)              | 0.55         |
| Non-epithelioid                                             | 5 (7.8)                 | 7 (11.5)               | 12 (9.6)                |              |
| <b>Smoking history - n (%)</b>                              |                         |                        |                         |              |
| Current (patient still smokes)                              | 3 (4.7)                 | 3 (4.9)                | 6 (4.8)                 | 0.60¥        |
| Former (≥ 100 cigarettes in the past during the whole life) | 29 (45.3)               | 23 (37.7)              | 52 (41.6)               | 0.38¥§       |
| Never (0-99 cigarettes during the whole life)               | 31 (48.4)               | 35 (57.4)              | 66 (52.8)               |              |
| Unknown/Missing                                             | 1 (1.6)                 | 0 (0.0)                | 1 (0.8)                 |              |
| <b>ECOG Performance status - n (%)</b>                      |                         |                        |                         |              |
| 0                                                           | 19 (29.7)               | 12 (19.7)              | 31 (24.8)               | 0.22§        |
| 1                                                           | 44 (68.8)               | 49 (80.3)              | 93 (74.4)               |              |
| 2~                                                          | 1 (1.6)                 | 0 (0.0)                | 1 (0.8)                 |              |
| <b>EORTC Score - n (%)</b>                                  |                         |                        |                         |              |
| Good prognosis                                              | 42 (65.6)               | 47 (77.0)              | 89 (71.2)               | 0.17         |
| Poor prognosis                                              | 22 (34.4)               | 14 (23.0)              | 36 (28.8)               |              |

| <b>Characteristic</b>                            | <b>Pembrolizumab<br/>(n=64)</b> | <b>Chemotherapy<br/>(n=61)</b> | <b>All patients<br/>(N=125)</b> | <b>p-value*</b> |
|--------------------------------------------------|---------------------------------|--------------------------------|---------------------------------|-----------------|
| <b>Prior treatment - n (%)</b>                   |                                 |                                |                                 |                 |
| Carboplatin/Pemetrexed                           | 23 (35.9)                       | 24 (39.3)                      | 47 (37.6)                       | 0.41            |
| Cisplatin/Pemetrexed                             | 23 (35.9)                       | 18 (29.5)                      | 41 (32.8)                       |                 |
| Platinum+/-Pemetrexed+/-Other                    | 11 (17.2)                       | 15 (24.6)                      | 26 (20.8)                       |                 |
| Cisplatin/Pemetrexed &<br>Carboplatin/Pemetrexed | 5 (7.8)                         | 1 (1.6)                        | 6 (4.8)                         |                 |
| Missing                                          | 2 (3.1)                         | 3 (4.9)                        | 5 (4.0)                         |                 |

**Extended Data Table 2:** Descriptive statistics of the biomarkers of interest, by treatment arm and overall (N=125)

(\$) Mann-Whitney test, (\*) Fisher's exact test, (#) without category 'Excluded'

| Cut-off     | Level            | Pembrolizumab<br>(n=64) | Chemotherapy<br>(n=61) | All patients<br>(N=125) | p-value             |
|-------------|------------------|-------------------------|------------------------|-------------------------|---------------------|
| <b>CD3</b>  |                  |                         |                        |                         |                     |
|             | n (%)            | 64 (51.2)               | 61 (48.8)              | 125 (100.0)             | 0.76 <sup>\$</sup>  |
|             | Mean (95% CI)    | 670.4 (459.6 - 881.2)   | 587.0 (403.6 - 770.4)  | 629.7 (491.3 - 768.2)   |                     |
|             | Median (min-max) | 308.9 (25.8 - 3398.3)   | 272.2 (11.9 - 3924.0)  | 303.8 (11.9 - 3924.0)   |                     |
| 300         | <300             | 31 (48.4%)              | 31 (50.8%)             | 62 (49.6%)              | 0.86*               |
|             | ≥300             | 33 (51.6%)              | 30 (49.2%)             | 63 (50.4%)              |                     |
| <b>CD8</b>  |                  |                         |                        |                         |                     |
|             | n (%)            | 64 (51.2)               | 61 (48.8)              | 125 (100.0)             | 0.37 <sup>\$</sup>  |
|             | Mean (95% CI)    | 110.1 (49.9 - 170.3)    | 42.4 (22.4 - 62.4)     | 77.1 (44.6 - 109.5)     |                     |
|             | Median (min-max) | 13.4 (0.0 - 1169.4)     | 12.6 (0.0 - 378.7)     | 12.8 (0.0 - 1169.4)     |                     |
| 10          | <10              | 30 (46.9%)              | 27 (44.3%)             | 57 (45.6%)              | 0.86*               |
|             | ≥10              | 34 (53.1%)              | 34 (55.7%)             | 68 (54.4%)              |                     |
| <b>CD68</b> |                  |                         |                        |                         |                     |
|             | n (%)            | 64 (51.2)               | 61 (48.8)              | 125 (100.0)             | 0.39 <sup>\$</sup>  |
|             | Mean (95% CI)    | 259.3 (195.0 - 323.6)   | 352.3 (227.8 - 476.9)  | 304.7 (236.1 - 373.3)   |                     |
|             | Median (min-max) | 172.8 (0.2 - 962.2)     | 162.8 (0.0 - 3095.2)   | 163.5 (0.0 - 3095.2)    |                     |
| 200         | <200             | 34 (53.1%)              | 33 (54.1%)             | 67 (53.6%)              | >0.99*              |
|             | ≥200             | 30 (46.9%)              | 28 (45.9%)             | 58 (46.4%)              |                     |
| <b>PD1</b>  |                  |                         |                        |                         |                     |
|             | n (%)            | 64 (51.2)               | 61 (48.8)              | 125 (100.0)             | 0.058 <sup>\$</sup> |
|             | Mean (95% CI)    | 88.4 (48.5 - 128.2)     | 122.9 (-3.4 - 249.1)   | 105.2 (41.2 - 169.2)    |                     |
|             | Median (min-max) | 24.5 (0.0 - 774.0)      | 13.5 (0.0 - 3321.5)    | 19.1 (0.0 - 3321.5)     |                     |
| 10          | <10              | 20 (31.3%)              | 24 (39.3%)             | 44 (35.2%)              | 0.36*               |
|             | ≥10              | 44 (68.8%)              | 37 (60.7%)             | 81 (64.8%)              |                     |
| Median      | <19              | 28 (43.8%)              | 34 (55.7%)             | 62 (49.6%)              | 0.21*               |
|             | ≥19              | 36 (56.3%)              | 27 (44.3%)             | 63 (50.4%)              |                     |

| Cut-off         | Level            | Pembrolizumab<br>(n=64) | Chemotherapy<br>(n=61) | All patients<br>(N=125) | p-value           |
|-----------------|------------------|-------------------------|------------------------|-------------------------|-------------------|
| <b>PDL1</b>     |                  |                         |                        |                         |                   |
|                 | n (%)            | 64 (51.2)               | 61 (48.8)              | 125 (100.0)             | 0.31 <sup>§</sup> |
|                 | Mean (95% CI)    | 465.1 (162.0 - 768.2)   | 378.4 (213.2 - 543.5)  | 422.8 (250.1 - 595.4)   |                   |
|                 | Median (min-max) | 89.0 (0.0 - 8694.7)     | 146.9 (0.0 - 4110.8)   | 117.6 (0.0 - 8694.7)    |                   |
| Median          | <118             | 36 (56.3%)              | 27 (44.3%)             | 63 (50.4%)              | 0.21*             |
|                 | ≥118             | 28 (43.8%)              | 34 (55.7%)             | 62 (49.6%)              |                   |
| <b>CD3-PD1</b>  |                  |                         |                        |                         |                   |
|                 | n (%)            | 64 (51.2)               | 61 (48.8)              | 125 (100.0)             | 0.15 <sup>§</sup> |
|                 | Mean (95% CI)    | 62.7 (29.5 - 95.8)      | 27.6 (14.9 - 40.2)     | 45.5 (27.4 - 63.6)      |                   |
|                 | Median (min-max) | 11.8 (0.0 - 619.8)      | 10.8 (0.0 - 280.6)     | 11.0 (0.0 - 619.8)      |                   |
| Median          | <11              | 30 (46.9%)              | 33 (54.1%)             | 63 (50.4%)              | 0.48*             |
|                 | ≥11              | 34 (53.1%)              | 28 (45.9%)             | 62 (49.6%)              |                   |
| <b>CD3-PDL1</b> |                  |                         |                        |                         |                   |
|                 | n (%)            | 64 (51.2)               | 61 (48.8)              | 125 (100.0)             | 0.54 <sup>§</sup> |
|                 | Mean (95% CI)    | 108.5 (30.2 - 186.8)    | 68.3 (27.4 - 109.2)    | 88.9 (44.6 - 133.2)     |                   |
|                 | Median (min-max) | 6.3 (0.0 - 2052.9)      | 12.9 (0.0 - 1044.1)    | 9.0 (0.0 - 2052.9)      |                   |
| Median          | <9               | 33 (51.6%)              | 30 (49.2%)             | 63 (50.4%)              | 0.86*             |
|                 | ≥9               | 31 (48.4%)              | 31 (50.8%)             | 62 (49.6%)              |                   |
| <b>CD8-PD1</b>  |                  |                         |                        |                         |                   |
|                 | n (%)            | 64 (51.2)               | 61 (48.8)              | 125 (100.0)             | 0.60 <sup>§</sup> |
|                 | Mean (95% CI)    | 22.7 (6.1 - 39.3)       | 6.4 (1.6 - 11.3)       | 14.8 (5.9 - 23.6)       |                   |
|                 | Median (min-max) | 1.0 (0.0 - 335.8)       | 1.0 (0.0 - 128.2)      | 1.0 (0.0 - 335.8)       |                   |
| 1               | <1               | 32 (50.0%)              | 30 (49.2%)             | 62 (49.6%)              | >0.99*            |
|                 | ≥1               | 32 (50.0%)              | 31 (50.8%)             | 63 (50.4%)              |                   |
| <b>CD8-PDL1</b> |                  |                         |                        |                         |                   |
|                 | n (%)            | 64 (51.2)               | 61 (48.8)              | 125 (100.0)             | 0.53 <sup>§</sup> |
|                 | Mean (95% CI)    | 25.7 (-0.8 - 52.1)      | 3.8 (2.3 - 5.4)        | 15.0 (1.5 - 28.5)       |                   |
|                 | Median (min-max) | 0.7 (0.0 - 807.2)       | 0.4 (0.0 - 24.4)       | 0.5 (0.0 - 807.2)       |                   |

| Cut-off                                                           | Level            | Pembrolizumab<br>(n=64) | Chemotherapy<br>(n=61) | All patients<br>(N=125) | p-value  |
|-------------------------------------------------------------------|------------------|-------------------------|------------------------|-------------------------|----------|
| Median                                                            | <0.5             | 31 (48.4%)              | 31 (50.8%)             | 62 (49.6%)              | 0.86*    |
|                                                                   | ≥0.5             | 33 (51.6%)              | 30 (49.2%)             | 63 (50.4%)              |          |
| <b>CD68-PD1</b>                                                   |                  |                         |                        |                         |          |
|                                                                   | n (%)            | 64 (51.2)               | 61 (48.8)              | 125 (100.0)             | 0.88§    |
|                                                                   | Mean (95% CI)    | 6.0 (1.7 - 10.2)        | 8.1 (-3.0 - 19.1)      | 7.0 (1.3 - 12.7)        |          |
|                                                                   | Median (min-max) | 0.2 (0.0 - 118.9)       | 0.2 (0.0 - 336.4)      | 0.2 (0.0 - 336.4)       |          |
| 0                                                                 | 0                | 27 (42.2%)              | 27 (44.3%)             | 54 (43.2%)              | 0.86*    |
|                                                                   | >0               | 37 (57.8%)              | 34 (55.7%)             | 71 (56.8%)              |          |
| <b>CD68-PDL1</b>                                                  |                  |                         |                        |                         |          |
|                                                                   | n (%)            | 64 (51.2)               | 61 (48.8)              | 125 (100.0)             | 0.094§   |
|                                                                   | Mean (95% CI)    | 24.4 (11.2 - 37.7)      | 32.5 (18.3 - 46.8)     | 28.4 (18.8 - 38.0)      |          |
|                                                                   | Median (min-max) | 3.2 (0.0 - 262.5)       | 8.4 (0.0 - 361.1)      | 5.0 (0.0 - 361.1)       |          |
| 5                                                                 | <5               | 36 (56.3%)              | 26 (42.6%)             | 62 (49.6%)              | 0.15*    |
|                                                                   | ≥5               | 28 (43.8%)              | 35 (57.4%)             | 63 (50.4%)              |          |
| <b>Inflammation type</b>                                          |                  |                         |                        |                         |          |
| Tumor CD8 ≥10/mm <sup>2</sup>                                     | Inflamed         | 34 (53.1%)              | 34 (55.7%)             | 68 (54.4%)              | >0.99*.# |
| Tumor CD8 <10/mm <sup>2</sup> &<br>Stroma CD8 ≥10/mm <sup>2</sup> | Excluded         | 15 (23.4%)              | 11 (18.0%)             | 26 (20.8%)              |          |
| Tumor & Stroma CD8<br><10/mm <sup>2</sup>                         | Desert           | 15 (23.4%)              | 16 (26.2%)             | 31 (24.8%)              |          |



**Extended Data Table 3:** Thresholds used for the analyses of 11 biomarkers and co-expressions.

| <b>Biomarker</b>          | <b>Predefined</b> | <b>Median</b> | <b>Cut-off point</b> |
|---------------------------|-------------------|---------------|----------------------|
| CD3/mm <sup>2</sup>       | ✓                 |               | ≥300                 |
| CD8/mm <sup>2</sup>       | ✓                 |               | ≥10                  |
| CD68/mm <sup>2</sup>      | ✓                 |               | ≥200                 |
| PD-1/mm <sup>2</sup>      | ✓                 |               | ≥10                  |
|                           |                   | ✓             | ≥19                  |
| PD-L1/mm <sup>2</sup>     |                   | ✓             | ≥118                 |
| CD3-PD1/mm <sup>2</sup>   |                   | ✓             | ≥11                  |
| CD3-PDL1/mm <sup>2</sup>  |                   | ✓             | ≥9                   |
| CD8-PD1/mm <sup>2</sup>   | ✓                 |               | ≥1                   |
| CD8-PDL1/mm <sup>2</sup>  |                   | ✓             | ≥0.5                 |
| CD68-PD1/mm <sup>2</sup>  | ✓                 |               | >0                   |
| CD68-PDL1/mm <sup>2</sup> | ✓                 |               | ≥5                   |

**Extended Data Table 4:** Cox proportional hazards regression for PFS and OS, separately for each biomarker, in the presence of treatment and treatment interaction, adjusted for baseline clinical variables

| Categorical Biomarkers  | PFS                                                               |                        | OS                    |
|-------------------------|-------------------------------------------------------------------|------------------------|-----------------------|
|                         | HR (95% CI)                                                       | interaction p-value*   |                       |
| CD68                    | high: 1.56 (0.86 - 2.82)<br>low: 0.63 (0.36 - 1.09)               | p = 0.031              | No significant effect |
| PDL1 (high vs low)      | 1.43 (0.95 - 2.15)                                                | p = 0.083 <sup>^</sup> |                       |
| CD3-PD1 (high vs low)   | 1.57 (1.04 - 2.38)                                                | p = 0.032 <sup>^</sup> |                       |
| <b>CD8-PD1</b>          | <b>high: 0.48 (0.27 - 0.84)</b><br><b>low: 1.60 (0.88 - 2.89)</b> | <b>p = 0.0043</b>      |                       |
| CD68-PD1                | high: 0.62 (0.36 - 1.06)<br>low: 1.48 (0.79 - 2.75)               | p = 0.042              |                       |
| CD68-PDL1 (high vs low) | 1.43 (0.95 - 2.16)                                                | p = 0.087 <sup>^</sup> |                       |
| CD3                     | No significant effect                                             |                        |                       |
| CD8                     |                                                                   |                        |                       |
| PD1                     |                                                                   |                        |                       |
| CD3-PDL1                |                                                                   |                        |                       |
| CD8-PDL1                |                                                                   |                        |                       |
| Inflammation type       |                                                                   |                        |                       |

(\* stratified by histological subtype; (^) not significant interaction

**Note 1:** Bold highlighted are the effects significant after FDR adjustment ( $q=0.0083$ ).

**Note 2:** Each line shows the biomarker effect found significant after backward selection at 10%, accounting also for the interaction with treatment and adjusting for clinical baseline characteristic. In all models, treatment arm is included for adjustment, and the effects of EORTC score and prior treatment were also found significant.

**Note 3:** For all biomarkers with significant interaction by treatment, the presented HR is describing the association of Pembrolizumab vs Chemotherapy, within each biomarker level.

**Extended Data Table 5: BICR ORR by biomarker (N=125; no. of responses=19).**

(\*)Fisher's exact test, (§)Breslow test for homogeneity, (£)C-M-H test controlling for treatment, (†)Homogeneity not satisfied, FDR: False Discovery Rate method, NS: Non-significant

|                      | n of patients | N - ORR(%) | 95% C.I.      | p-value         |
|----------------------|---------------|------------|---------------|-----------------|
| <b>CD3</b>           |               |            |               |                 |
| <i>Cut-off 300</i>   |               |            |               |                 |
| <b>Chemotherapy</b>  |               |            |               |                 |
| <300                 | 31            | 3 - 9.7%   | 2% - 25.8%    | 0.61*           |
| ≥300                 | 30            | 1 - 3.3%   | 0.1% - 17.2%  |                 |
| <b>Pembrolizumab</b> |               |            |               |                 |
| <300                 | 31            | 6 - 19.4%  | 7.5% - 37.5%  | 0.56*           |
| ≥300                 | 33            | 9 - 27.3%  | 13.3% - 45.5% |                 |
| <b>Whole cohort</b>  |               |            |               |                 |
| <300                 | 62            | 9 - 14.5%  | 6.9% - 25.8%  | 0.88£ (0.215§)  |
| ≥300                 | 63            | 10 - 15.9% | 7.9% - 27.3%  |                 |
| <b>CD8</b>           |               |            |               |                 |
| <i>Cut-off 10</i>    |               |            |               |                 |
| <b>Chemotherapy</b>  |               |            |               |                 |
| <10                  | 27            | 0 - 0.0%   | NE - NE       | 0.12*           |
| ≥10                  | 34            | 4 - 11.8%  | 3.3% - 27.5%  |                 |
| <b>Pembrolizumab</b> |               |            |               |                 |
| <10                  | 30            | 5 - 16.7%  | 5.6% - 34.7%  | 0.255*          |
| ≥10                  | 34            | 10 - 29.4% | 15.1% - 47.5% |                 |
| <b>Whole cohort</b>  |               |            |               |                 |
| <10                  | 57            | 5 - 8.8%   | 2.9% - 19.3%  | 0.052£ (0.215§) |
| ≥10                  | 68            | 14 - 20.6% | 11.7% - 32.1% |                 |
| <b>CD68</b>          |               |            |               |                 |
| <i>Cut-off 200</i>   |               |            |               |                 |

|                       | n of patients | N - ORR(%) | 95% C.I.      | p-value                                                                     |
|-----------------------|---------------|------------|---------------|-----------------------------------------------------------------------------|
| <b>Chemotherapy</b>   |               |            |               |                                                                             |
| <200                  | 33            | 3 - 9.1%   | 1.9% - 24.3%  | 0.62*                                                                       |
| ≥200                  | 28            | 1 - 3.6%   | 0.1% - 18.3%  |                                                                             |
| <b>Pembrolizumab</b>  |               |            |               |                                                                             |
| <200                  | 34            | 12 - 35.3% | 19.7% - 53.5% | <b>0.02*</b><br>(NS by FDR, q = 0.004)                                      |
| ≥200                  | 30            | 3 - 10%    | 2.1% - 26.5%  |                                                                             |
| <b>Whole cohort</b>   |               |            |               |                                                                             |
| <200                  | 67            | 15 - 22.4% | 13.1% - 34.2% | <b>0.013<sup>£</sup></b><br>(NS by FDR, q = 0.004)<br>(0.663 <sup>§</sup> ) |
| ≥200                  | 58            | 4 - 6.9%   | 1.9% - 16.7%  |                                                                             |
| <b>PD1</b>            |               |            |               |                                                                             |
| <b>Cut-off 10</b>     |               |            |               |                                                                             |
| <b>Chemotherapy</b>   |               |            |               |                                                                             |
| <10                   | 24            | 3 - 12.5%  | 2.7% - 32.4%  | 0.29*                                                                       |
| ≥10                   | 37            | 1 - 2.7%   | 0.1% - 14.2%  |                                                                             |
| <b>Pembrolizumab</b>  |               |            |               |                                                                             |
| <10                   | 20            | 4 - 20%    | 5.7% - 43.7%  | 0.76*                                                                       |
| ≥10                   | 44            | 11 - 25%   | 13.2% - 40.3% |                                                                             |
| <b>Whole cohort</b>   |               |            |               |                                                                             |
| <10                   | 44            | 7 - 15.9%  | 6.6% - 30.1%  | 0.69 <sup>£</sup> (0.135 <sup>§</sup> )                                     |
| ≥10                   | 81            | 12 - 14.8% | 7.9% - 24.4%  |                                                                             |
| <b>Cut-off Median</b> |               |            |               |                                                                             |
| <b>Chemotherapy</b>   |               |            |               |                                                                             |
| <19                   | 34            | 4 - 11.8%  | 3.3% - 27.5%  | 0.12*                                                                       |
| ≥19                   | 27            | 0 - 0.0%   | NE - NE       |                                                                             |
| <b>Pembrolizumab</b>  |               |            |               |                                                                             |
| <19                   | 28            | 6 - 21.4%  | 8.3% - 41%    | 0.775*                                                                      |
| ≥19                   | 36            | 9 - 25%    | 12.1% - 42.2% |                                                                             |
| <b>Whole cohort</b>   |               |            |               |                                                                             |
| <19                   | 62            | 10 - 16.1% | 8% - 27.7%    | 0.54 <sup>£</sup> (0.07 <sup>§</sup> )                                      |
| ≥19                   | 63            | 9 - 14.3%  | 6.7% - 25.4%  |                                                                             |

|                       | n of patients | N - ORR(%) | 95% C.I.      | p-value                                |
|-----------------------|---------------|------------|---------------|----------------------------------------|
| <b>PDL1</b>           |               |            |               |                                        |
| <i>Cut-off Median</i> |               |            |               |                                        |
| <b>Chemotherapy</b>   |               |            |               |                                        |
| <118                  | 27            | 1 - 3.7%   | 0.1% - 19%    | 0.62*                                  |
| ≥118                  | 34            | 3 - 8.8%   | 1.9% - 23.7%  |                                        |
| <b>Pembrolizumab</b>  |               |            |               |                                        |
| <118                  | 36            | 7 - 19.4%  | 8.2% - 36%    | 0.55*                                  |
| ≥118                  | 28            | 8 - 28.6%  | 13.2% - 48.7% |                                        |
| <b>Whole cohort</b>   |               |            |               |                                        |
| <118                  | 63            | 8 - 12.7%  | 5.6% - 23.5%  | 0.26 <sup>£</sup> (0.75 <sup>§</sup> ) |
| ≥118                  | 62            | 11 - 17.7% | 9.2% - 29.5%  |                                        |
| <b>CD3-PD1</b>        |               |            |               |                                        |
| <i>Cut-off Median</i> |               |            |               |                                        |
| <b>Chemotherapy</b>   |               |            |               |                                        |
| <11                   | 33            | 3 - 9.1%   | 1.9% - 24.3%  | 0.62*                                  |
| ≥11                   | 28            | 1 - 3.6%   | 0.1% - 18.3%  |                                        |
| <b>Pembrolizumab</b>  |               |            |               |                                        |
| <11                   | 30            | 6 - 20%    | 7.7% - 38.6%  | 0.57*                                  |
| ≥11                   | 34            | 9 - 26.5%  | 12.9% - 44.4% |                                        |
| <b>Whole cohort</b>   |               |            |               |                                        |
| <11                   | 63            | 9 - 14.3%  | 6.7% - 25.4%  | 0.92 <sup>£</sup> (0.29 <sup>§</sup> ) |
| ≥11                   | 62            | 10 - 16.1% | 8% - 27.7%    |                                        |
| <b>CD3-PDL1</b>       |               |            |               |                                        |
| <i>Cut-off Median</i> |               |            |               |                                        |
| <b>Chemotherapy</b>   |               |            |               |                                        |
| <9                    | 30            | 2 - 6.7%   | 0.8% - 22.1%  | >0.99*                                 |
| ≥9                    | 31            | 2 - 6.5%   | 0.8% - 21.4%  |                                        |
| <b>Pembrolizumab</b>  |               |            |               |                                        |

|                       | n of patients | N - ORR(%) | 95% C.I.      | p-value                                        |
|-----------------------|---------------|------------|---------------|------------------------------------------------|
| <9                    | 33            | 6 - 18.2%  | 7% - 35.5%    | 0.38*                                          |
| ≥9                    | 31            | 9 - 29%    | 14.2% - 48%   |                                                |
| <b>Whole cohort</b>   |               |            |               |                                                |
| <9                    | 63            | 8 - 12.7%  | 5.6% - 23.5%  | 0.39 <sup>£</sup> (0.59 <sup>§</sup> )         |
| ≥9                    | 62            | 11 - 17.7% | 9.2% - 29.5%  |                                                |
| <b>CD8-PD1</b>        |               |            |               |                                                |
| <i>Cut-off 1</i>      |               |            |               |                                                |
| <b>Chemotherapy</b>   |               |            |               |                                                |
| <1                    | 30            | 3 - 10%    | 2.1% - 26.5%  | 0.35*                                          |
| ≥1                    | 31            | 1 - 3.2%   | 0.1% - 16.7%  |                                                |
| <b>Pembrolizumab</b>  |               |            |               |                                                |
| <1                    | 32            | 5 - 15.6%  | 5.3% - 32.8%  | 0.24*                                          |
| ≥1                    | 32            | 10 - 31.3% | 16.1% - 50%   |                                                |
| <b>Whole cohort</b>   |               |            |               |                                                |
| <1                    | 62            | 8 - 12.9%  | 5.7% - 23.9%  | 0.46 <sup>£</sup> (0.093 <sup>§</sup> )        |
| ≥1                    | 63            | 11 - 17.5% | 9.1% - 29.1%  |                                                |
| <b>CD8-PDL1</b>       |               |            |               |                                                |
| <i>Cut-off Median</i> |               |            |               |                                                |
| <b>Chemotherapy</b>   |               |            |               |                                                |
| <0.5                  | 31            | 1 - 3.2%   | 0.1% - 16.7%  | 0.35*                                          |
| ≥0.5                  | 30            | 3 - 10%    | 2.1% - 26.5%  |                                                |
| <b>Pembrolizumab</b>  |               |            |               |                                                |
| <0.5                  | 31            | 4 - 12.9%  | 3.6% - 29.8%  | 0.077*                                         |
| ≥0.5                  | 33            | 11 - 33.3% | 18% - 51.8%   |                                                |
| <b>Whole cohort</b>   |               |            |               |                                                |
| <0.5                  | 62            | 5 - 8.1%   | 2.7% - 17.8%  | <b>0.029<sup>£</sup></b>                       |
| ≥0.5                  | 63            | 14 - 22.2% | 12.7% - 34.5% | (NS by FDR, q = 0.008)<br>(0.99 <sup>§</sup> ) |
| <b>CD68-PD1</b>       |               |            |               |                                                |

|                      | n of patients | N - ORR(%) | 95% C.I.      | p-value                                 |
|----------------------|---------------|------------|---------------|-----------------------------------------|
| <b>Cut-off 0</b>     |               |            |               |                                         |
| <b>Chemotherapy</b>  |               |            |               |                                         |
| 0                    | 27            | 3 - 11.1%  | 2.4% - 29.2%  | 0.31*                                   |
| >0                   | 34            | 1 - 2.9%   | 0.1% - 15.3%  |                                         |
| <b>Pembrolizumab</b> |               |            |               |                                         |
| 0                    | 27            | 4 - 14.8%  | 4.2% - 33.7%  | 0.235*                                  |
| >0                   | 37            | 11 - 29.7% | 15.9% - 47%   |                                         |
| <b>Whole cohort</b>  |               |            |               |                                         |
| 0                    | 54            | 7 - 13%    | 5.4% - 24.9%  | 0.57 <sup>£</sup> (0.066 <sup>§</sup> ) |
| >0                   | 71            | 12 - 16.9% | 9% - 27.7%    |                                         |
| <b>CD68-PDL1</b>     |               |            |               |                                         |
| <b>Cut-off 5</b>     |               |            |               |                                         |
| <b>Chemotherapy</b>  |               |            |               |                                         |
| <5                   | 26            | 2 - 7.7%   | 0.9% - 25.1%  | >0.99*                                  |
| ≥5                   | 35            | 2 - 5.7%   | 0.7% - 19.2%  |                                         |
| <b>Pembrolizumab</b> |               |            |               |                                         |
| <5                   | 36            | 7 - 19.4%  | 8.2% - 36%    | 0.55*                                   |
| ≥5                   | 28            | 8 - 28.6%  | 13.2% - 48.7% |                                         |
| <b>Whole cohort</b>  |               |            |               |                                         |
| <5                   | 62            | 9 - 14.5%  | 6.9% - 25.8%  | 0.56 <sup>£</sup> (0.49 <sup>§</sup> )  |
| ≥5                   | 63            | 10 - 15.9% | 7.9% - 27.3%  |                                         |

**Extended Data Table 6:** Univariate Cox models for PFS and OS, separately for the continuous biomarker measurements, for the overall cohort (sensitivity analysis).

SI: Significant interaction, SBE: Significant Biomarker Effect (main effect)

| <b>Continuous biomarkers</b> | <b>PFS</b>            | <b>OS</b>      |
|------------------------------|-----------------------|----------------|
| <i>CD3</i>                   | -                     | -              |
| CD8                          | -                     | SI, p = 0.060  |
| <i>CD68</i>                  | -                     | -              |
| <i>PD1</i>                   | -                     | -              |
| <i>PDL1</i>                  | -                     | -              |
| CD3-PD1                      | <b>SI, p = 0.0014</b> | SBE, p = 0.096 |
| <i>CD3-PDL1</i>              | -                     | -              |
| CD8-PD1                      | <b>SI, p = 0.025</b>  | -              |
| <i>CD8-PDL1</i>              | -                     | -              |
| CD68-PD1                     | -                     | SBE, p = 0.055 |
| CD68-PDL1                    | <b>SI, p = 0.032</b>  | -              |

**Note 1:** Bold highlighted are the effects significant at 5%.

**Note 2:** In all models, the effect of EORTC score and prior treatment remained significant after backward selection at 10%.



**Extended Data Table 7:** Final model for OS after backward multivariable selection at 10%.

|                                                        | <b>HR (95% C.I.)</b>      | <b>interaction p-value*</b>  |
|--------------------------------------------------------|---------------------------|------------------------------|
| <b>CD68-PD1 (high vs low)</b>                          |                           |                              |
| Pembrolizumab                                          | 0.43 (0.21 - 0.86)        | <b>0.015</b>                 |
| Chemotherapy                                           | 1.63 (0.73 - 3.59)        |                              |
| <b>PDL1 (high vs low)</b>                              |                           |                              |
| Pembrolizumab                                          | 0.71 (0.30 - 1.70)        | <b>0.033</b>                 |
| Chemotherapy                                           | 2.26 (0.91 - 5.59)        |                              |
| <b>CD68 (high vs low)</b>                              |                           |                              |
|                                                        | 1.85 (1.12 - 3.06)        | <b>0.016<sup>^</sup></b>     |
| <b>Sex (female vs male)</b>                            |                           |                              |
|                                                        | 2.01 (1.02 - 3.95)        | <b>0.043<sup>^</sup></b>     |
| <b>EORTC score (good vs poor prognosis)</b>            |                           |                              |
|                                                        | 0.22 (0.12 - 0.41)        | <b>&lt;0.001<sup>^</sup></b> |
| <b>Prior treatment</b>                                 |                           |                              |
| <i>Both/Other/Missing vs. Cisplatin/Pemetrexed</i>     | <i>0.80 (0.46 - 1.39)</i> | <i>0.42<sup>^</sup></i>      |
| <i>Carboplatin/Pemetrexed vs. Cisplatin/Pemetrexed</i> | <i>0.41 (0.22 - 0.75)</i> | <b>0.0041<sup>^</sup></b>    |
| <b>CD3 (high vs low)</b>                               |                           |                              |
| <i>Pembrolizumab</i>                                   | <i>1.95 (0.81 - 4.69)</i> | <i>0.089</i>                 |
| <i>Chemotherapy</i>                                    | <i>0.83 (0.36 - 1.91)</i> |                              |
| <b>CD3-PDL1 (high vs low)</b>                          |                           |                              |
|                                                        | <i>0.48 (0.21 - 1.08)</i> | <i>0.077<sup>^</sup></i>     |
| <b>Inflammation type</b>                               |                           |                              |
| <i>Excluded vs. Inflamed</i>                           | <i>0.50 (0.22 - 1.13)</i> | <i>0.094<sup>^</sup></i>     |
| <i>Desert vs. Inflamed</i>                             | <i>1.25 (0.64 - 2.43)</i> | <i>0.52<sup>^</sup></i>      |

(\*) stratified by histologic subtype, (^) no interaction with treatment

|                      | n of patients | n (%) of PFS events | 6-m PFS% (95% C.I.) | Median PFS (95% C.I.) | Log-rank p-value |
|----------------------|---------------|---------------------|---------------------|-----------------------|------------------|
| <b>CD3+PD1+CD8-</b>  |               |                     |                     |                       |                  |
| <i>Cut-off 6</i>     |               |                     |                     |                       |                  |
| <b>Chemotherapy</b>  |               |                     |                     |                       |                  |
| <6                   | 34            | 26 (76.5)           | 32.2 (16.9 - 48.5)  | 4.1 (2.1 - 5.4)       |                  |
| ≥6                   | 27            | 24 (88.9)           | 19.7 ( 6.7 - 37.8)  | 2.3 (2.0 - 3.6)       |                  |
| All patients         | 61            | 50 (82.0)           | 26.5 (15.6 - 38.7)  | 2.5 (2.1 - 4.2)       | 0.16             |
| <b>Pembrolizumab</b> |               |                     |                     |                       |                  |
| <6                   | 28            | 25 (89.3)           | 15.4 ( 4.9 - 31.3)  | 3.3 (1.9 - 4.2)       |                  |
| ≥6                   | 36            | 29 (80.6)           | 30.2 (15.9 - 45.9)  | 2.4 (2.0 - 4.2)       |                  |
| All patients         | 64            | 54 (84.4)           | 23.7 (13.9 - 35.0)  | 2.5 (2.1 - 4.2)       | 0.35             |
| <b>Whole cohort</b>  |               |                     |                     |                       |                  |
| <6                   | 62            | 51 (82.3)           | 24.3 (14.2 - 36.0)  | 4.1 (2.1 - 4.2)       |                  |
| ≥6                   | 63            | 53 (84.1)           | 25.8 (15.3 - 37.6)  | 2.3 (2.1 - 4.1)       |                  |
| All patients         | 125           | 104 (83.2)          | 25.0 (17.5 - 33.3)  | 2.5 (2.2 - 4.1)       | 0.80, 0.77*      |

(\*) Stratified log-rank by histologic subtype

**Extended Data Table 8: Analysis of progression-free survival in function of the presence or absence of CD3pPD1pCD8n cells** Progression-free survival, within each CD3+PD1+CD8- level, by treatment arm and overall (N=125)

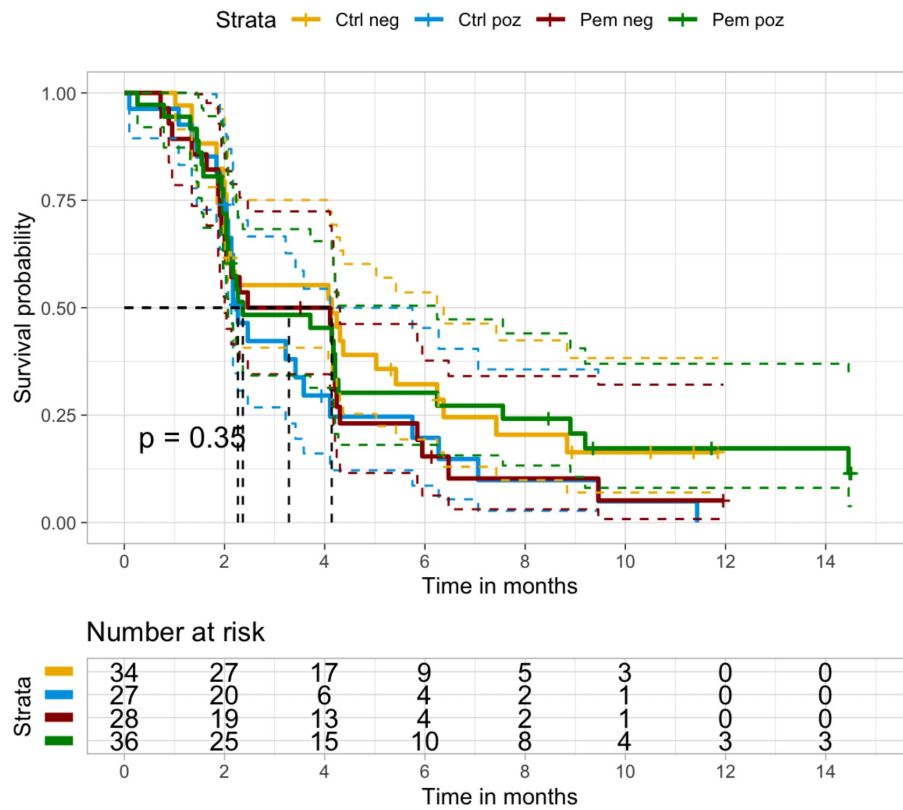

**Extended Data Figure 4: Analysis of progression-free survival in function of the presence or absence of CD3pPD1pCD8n cells** Kaplan-Meier survival estimates in control and pembrolizumab treated patients with marker (CD3+PD1+CD8-) negative and positive patients
